# Supplementary material for: A CUG codon adapted two-hybrid system for the pathogenic fungus Candida albicans
Source: PubMed Central journal article supplement — Nucleic Acids Res. 2010 Aug 17;38(19):e184. doi: 10.1093/nar/gkq725 (PMC2965261; doi:10.1093/nar/gkq725), 2010-08-17
Supplement: supp_gkq725_nar-01035-met-k-2010-File006.pdf [file supp_gkq725_nar-01035-met-k-2010-File006.pdf]

**Supplementary Table 1. Primers**

| Primer name                                             | Restriction site | Sequence                                                                                                                                                  |
|---------------------------------------------------------|------------------|-----------------------------------------------------------------------------------------------------------------------------------------------------------|
| a) Construction of pCOLH0, pCOLH1, pCOLH2 and pC2H-HIS1 |                  |                                                                                                                                                           |
| HIS1-F                                                  | XmaI             | <u>CCCGGGAACGTCATGGATTTAGTCAATCAT</u>                                                                                                                     |
| HIS1-R                                                  | Clal             | AGTCATCGATCTAGAAAACCGTACCAGGTG                                                                                                                            |
| NAT1-F                                                  | AatII            | ATCGGACGTCCAGAGCTATTAAGATCACCAG                                                                                                                           |
| NAT1-R                                                  | NarI             | ATCGGGCGCCCTTCTAGAATTTTATGATG                                                                                                                             |
| HIS1IS-F                                                | SacI             | <u>AAGAGCTCATAGTCAGTAGCTAAACTG</u>                                                                                                                        |
| HIS1IS-R                                                | SacI             | <u>AAGAGCTCCTAGCCTATAGGTACCCTG</u>                                                                                                                        |
| b) Construction of pC2H-LACZ                            |                  |                                                                                                                                                           |
| MPA-F                                                   | AatII            | ATCGGACGTCTAGATGTTTATGATACTAAGG                                                                                                                           |
| MPA-R                                                   | NarI             | ATCGGGCGCCTCTAGAACTCAGTATATCTTC                                                                                                                           |
| RPS1-F                                                  | PacI             | ATCGTTAATTAACATGGCTGTCGGTAAAAAC                                                                                                                           |
| RPS1-R                                                  | MluNI            | ATCGTGGCCATTAACAGATTCTAAAAACAAC                                                                                                                           |
| HIS1TLac-F                                              | SacI             | ATCGGAGCTCAAGAAGTGATAGTTTCTCATAAAT                                                                                                                        |
| HIS1TLac-R                                              | SacI             | ATCGGAGCTCCTAGAAAACCGTACCAGGTG                                                                                                                            |
| 4xLexA-F                                                | Apal             | <u>GGGCCCTTGCGAATATTTGTTTCGTATTTGCGAATATTTGT</u><br><u>TCGTATTTGCGAATATTTGTTTCGTATTTGCGAATATTTGTT</u><br><u>CGTATGGGCC</u>                                |
| 4xLexA-R                                                | Apal             | <u>GGGCCCATACGAACAAATATTCGCAAATACGAACAAATA</u><br><u>TTCGCAAATACGAACAAATATTCGCAAATACGAACAAAT</u><br><u>ATTCGCAAGGGCCC</u>                                 |
| c) Construction of pC2HB                                |                  |                                                                                                                                                           |
| MCSB-F                                                  | BspEI, SalI      | <u>CTCCGGAAGATCTGGTGCTGGTGGTGGTGGTATCCGTATG</u><br><u>ATGTGCCTGACTACGCAGGTGCTGGTGGTGGTGGTGCTA</u><br><u>GCAGGCCTTTCGAAAGGCGCGCCGTCGACC</u>                |
| MCSB-R                                                  | BspEI, SalI      | <u>CCGGGTCGACGGCGGCCTTTCGAAAGGCCTGCTAGCA</u><br><u>CCAACACCACCAGCACCTGCGTAGTCAGGCACATCATA</u><br><u>GGATAACCAACACCACCAGCACCATCTTCCGGAGACG</u><br><u>T</u> |
| LexA-F                                                  | AccIII           | ATCGTCCGGAATGGGTGCTCCTCCAAAAAAGAAGAGAAA<br>GGTAGCTAGAGAATTAACAAAACGACAAAGCG                                                                               |
| LexA-R                                                  | BglII            | ATCGAGATCTCATTCGCGGTACAAACC                                                                                                                               |
| MET3P-F                                                 | AatII            | <u>GACGCTTCCAATTAGAGTTGTGGA</u>                                                                                                                           |
| MET3P-R                                                 | BspEI            | <u>TCCGGAGTTTTCTGGGAGGGTATTTAC</u>                                                                                                                        |
| ACT1TB-F                                                | SalI             | ATCGGTCGACGGATCCGAGTGAAATTCTGG                                                                                                                            |
| ACT1TB-R                                                | DraIII           | ATCGCACGAAGTGTGAAGGGGGAGATTTTCAC                                                                                                                          |
| BIS-F                                                   | PvuI             | ACTGTACGTAATCACCTTGTCTTGCCCGTG                                                                                                                            |
| BIS-R                                                   | SnaBI            | ACTGCGATCGACCAGATCAAAATGCTAGAAC                                                                                                                           |
| NotIB                                                   | AseI             | <u>TTCCATTAATGCGGCCGATTAATGGAA</u>                                                                                                                        |
| NewMCSB-F                                               | AseI, BsaJI      | <u>AAGGCGCGCCACGCGTAGTACTTAACCGCGGAAAA</u>                                                                                                                |
| NewMCSB-R                                               | AseI, BsaJI      | <u>TTTTCCGCGGTTAAGTACTACGCGTGGCGGCCTT</u>                                                                                                                 |
| d) Construction of pC2HP                                |                  |                                                                                                                                                           |
| MCSP-F1                                                 | AatII            | <u>CTCCGGAATGGGTGCTCCTCCAAAAAAGAAGAGAAAGGT</u><br><u>AGCTCCGCGGGCTAGCGGTGCTGGTGGTGGTGGTACTA</u><br><u>CAAAGACCATGACGGTG</u>                               |
| MCSP-F2                                                 | SgrAI            | ATTATAAAGATCATGACATCGATTACAAGGATGACGATG<br>ACAAGGGAGCAGGAGGCGTCCGGAAGGCCTGAAGACGGG<br>ATCGTTCGAACG                                                        |
| MCSP-R1                                                 | SgrAI            | <u>CCGGCGTTCGAACGATCCCGTCTTCAGGCCTTCCGACGCC</u><br><u>TCCTGCTCCCTTGTTCATCGTCATCCTTGTAAATCGATGTCA</u><br><u>TGATCTTTATAATCACCGTCATGGTCTTTGTAGTC</u>        |

|                                               |             |                                                                                   |
|-----------------------------------------------|-------------|-----------------------------------------------------------------------------------|
| MCSP-R2                                       | AatII       | ACCAACACCACCAGCACCGCTAGCCCGCGGAGCTACCTT<br>TCTCTTCTTTTTTGGAGGAGCACCCATTCCGGAGACGT |
| MET3P-F                                       | AatII       | <u>GACGTC</u> TCCAATTAGAGGTTGTGGA                                                 |
| MET3P-R                                       | BspEI       | <u>TCCGGAGT</u> TTTTCTGGGGAGGGTATTTAC                                             |
| ACT1TP-F                                      | SgrAI       | ATCGCGCCGGTGTGAAGGGGGAGATTTTCAC                                                   |
| ACT1TP-R                                      | BstBI       | ATCGTTCGAAGAGTGAAATTCTGGAAATCTGG                                                  |
| PIS-F                                         | PflMI       | CCAAATATTGGTAACAGAGGTAACAACACTCTGG                                                |
| PIS-R                                         | ApaI        | <u>GGGCCCTT</u> GAGAATTGGAAGAAGTTGGC                                              |
| NotIP                                         |             | GCGGCCGC                                                                          |
| VP16P-F                                       | SacII       | ATTACCGCGGTCTCCAGGGCCCCG                                                          |
| VP16P-R                                       | NheI        | ATTAGCTAGCACCACCGTATTCATC                                                         |
| NewMCSP-F                                     | StuI, EcoRI | AAAGGCCTCCC GGGAGGCGGCCACGCGTAGTACTTAAG<br>ATATCCC                                |
| NewMCSP-R                                     | StuI, EcoRI | GGGATATCTTAAAGTACTACGCGTGGCGGCCTCCCGGA<br>GGCCTT                                  |
| e) Cloning of bait and prey genes of interest |             |                                                                                   |
| INO4-F                                        | NheI        | <u>GCTAGCATGT</u> CGTCCGATAGTAGTTCACC                                             |
| INO4-R                                        | StuI        | <u>AGGCCTT</u> TATTTTGC GATACACTACCATCG                                           |
| INO2-F                                        | NheI        | <u>GCTAGCATGT</u> TCTTCCACTGTTACCC                                                |
| INO2-R                                        | StuI        | <u>AGGCCT</u> CTACCTATTTTCTATTAATTTT                                              |
| KIS1-F                                        | NheI        | ACTGGCTAGCCTCAGTCCAAAATCTAC                                                       |
| KIS1-R                                        | SalI        | ACTGGTCGACTCACAGTTGCTGCTCTTG                                                      |
| SNF4-F                                        | StuI        | ACTGAGGCCTACTGACATAGCACCACC                                                       |
| SNF4-R                                        | BstBI       | ACTGTTCGAACTAATCTTCTCCAAATAATATG                                                  |
| CEK1-F                                        | NheI        | <u>GCTAGCATGAT</u> GAATATAGATCAACATC                                              |
| CEK1-R                                        | StuI        | <u>AGGCCTT</u> TATAATGGCTTCATAATCTC                                               |
| CEK2-F                                        | StuI        | AAGGAGGCCTATGAAGAAATCTACTGGCCCCAC                                                 |
| CEK2-R                                        | SalI        | AAGGGTCGACTTACGACATGACTATTTTCG                                                    |
| CPH1-F                                        | StuI        | <u>AGGCCTATGT</u> CAATTACTAAAACATACAATGG                                          |
| CPH1-R                                        | StuI        | <u>AGGCCT</u> CTATGTTTGTGACTGTTTACTTC                                             |
| VP16Cterm-F                                   | StuI        | GGAGGCCTTCTCCAGGGCCCCGTTTCAC                                                      |
| VP16Cterm-R                                   | AscI        | AGGCGCGCCATTAACCACCGTATTCATCAATACC                                                |
| CPH1Nterm-F                                   | XmaI        | TCCCCCGGGATGTCAATTACTAAAACATACAATGG                                               |
| CPH1Nterm-R                                   | NheI        | AAGGAGCTAGCTGTTTGTGACTGTTTACTTCTTC                                                |
| HST7-F                                        | StuI        | AAGGAGGCCTATGACAAGAACAACCTCGTATAG                                                 |
| HST7-R                                        | BstBI       | AAGGTTCGAATTACACTTTGCATTTTCTGATC                                                  |
| HST7-Y2H-F                                    | XmaI        | <u>CCCGGC</u> CATGACAAGAACAACCTCGTATAG                                            |
| HST7-Y2H-R                                    | XmaI        | <u>CCCGGC</u> TTACACTTTGCATTTTCTGATC                                              |
| CEK1-Y2H-F                                    | XmaI        | <u>CCCGGC</u> CATGATGAATATAGATCAACATC                                             |
| CEK1-Y2H-R                                    | XmaI        | <u>CCCGGC</u> TTATAATGGCTTCATAATCTC                                               |

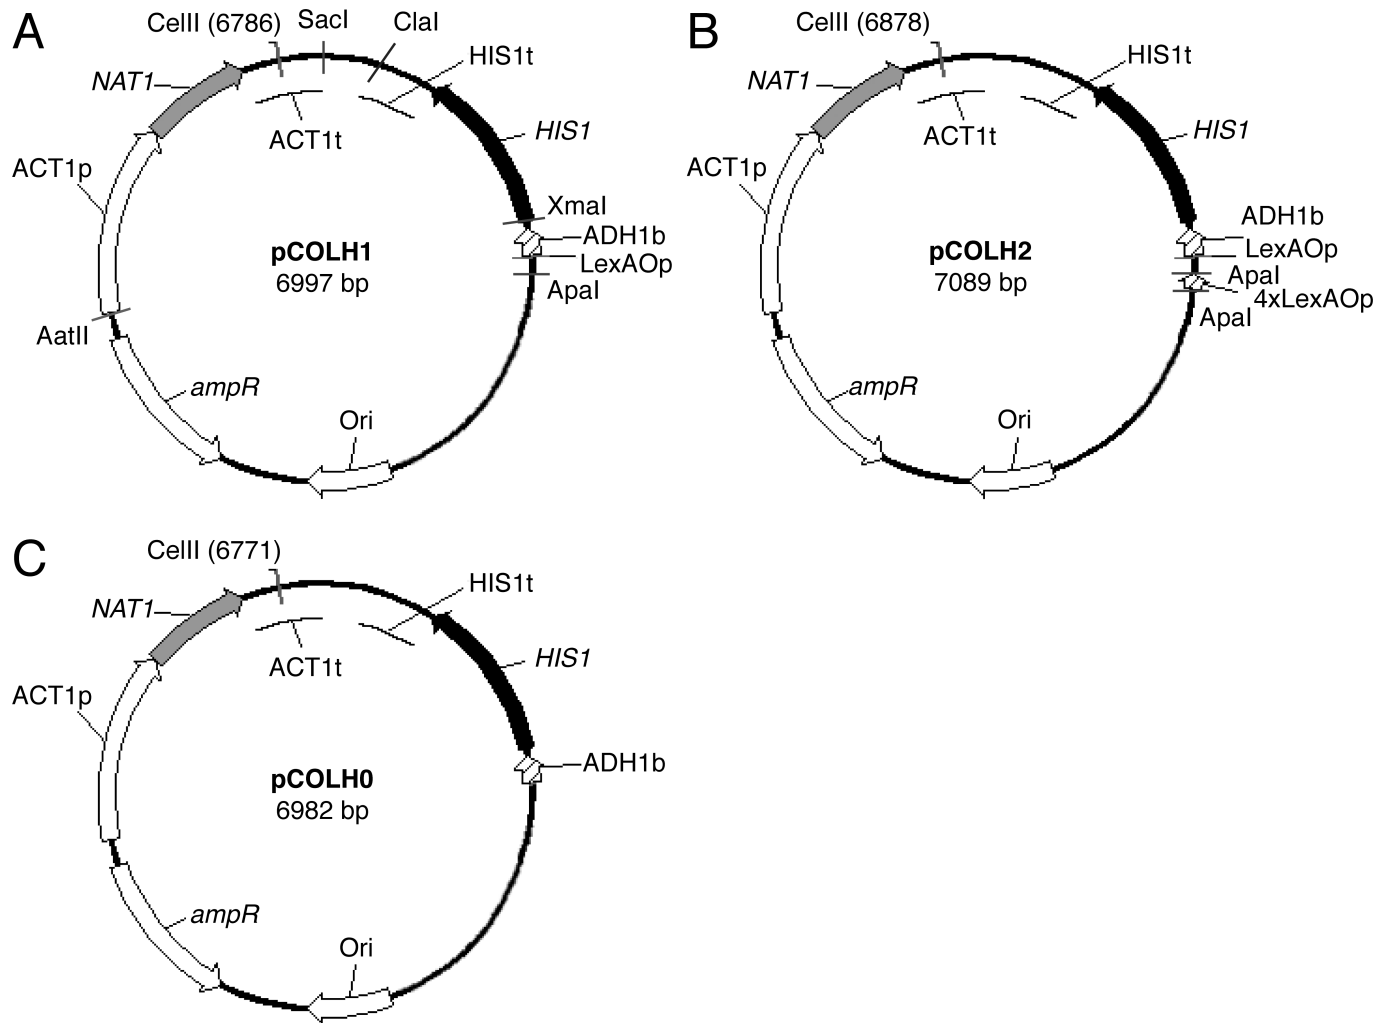

**Supplementary Figure 1.** (A) Plasmid pCOLH1 contains reporter gene *HIS1* with upstream a basal *ADH1* promoter and one LexAOp sequence. (B) Plasmid pCOLH2 contains reporter gene *HIS1* with upstream a basal *ADH1* promoter and five LexAOp sequences. (C) Plasmid pCOLH0 contains reporter gene *HIS1* with upstream a basal *ADH1* promoter and no LexAOp sequences. All three plasmids integrate at the *ACT1* terminator and *NAT1* is used for selective growth on nourseothricin. ADH1b: *ADH1* basal promoter; p: promoter; t: terminator; Ori: origin of replication.
